# Supplementary material
Source: MDPI journal article supplement (https://www.mdpi.com/2297-8739/10/8/445)
Supplement: s1 [file s1]

---

# *Supplementary Material*

## High-Degree Oxidative Desulfurization of a Commercial Marine Fuel Using Deep Eutectic Solvents and Their Recycling Process

Olga Thoda <sup>1</sup>, Efstratios Svinterikos <sup>1</sup>, Konstantinos Miltiadis Sakkas <sup>2</sup>, Anastasia Maria Moschovi <sup>2</sup>  
and Iakovos Yakoumis <sup>1,2,\*</sup>

<sup>11</sup> Monolithos Catalysts & Recycling Ltd., 83 Vrilissou, 11476 Athens, Greece; thoda@monolithos.gr (O.T.); svinterikos@monolithos.gr (E.S.)

<sup>2</sup> YS Cypriot Catalysts Ltd., Lefkosias Avenue 50, Psevdas, Limassol 7649, Cyprus; sakkas@yscc.eu (K.M.S.); moschovi@yscc.eu (A.M.M.)

\* Correspondence: yakoumis@monolithos-catalysts.gr; Tel.: +30-2106450106

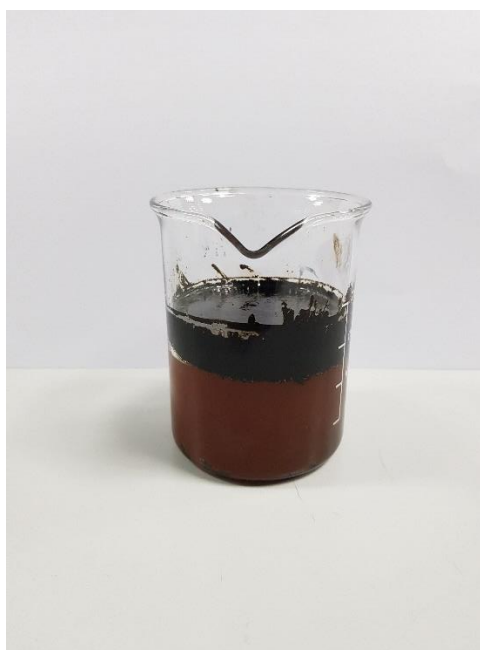

Figure S1. The phase separation after extraction with ChCl/LA (1/2) (Experiment No. 9).

---

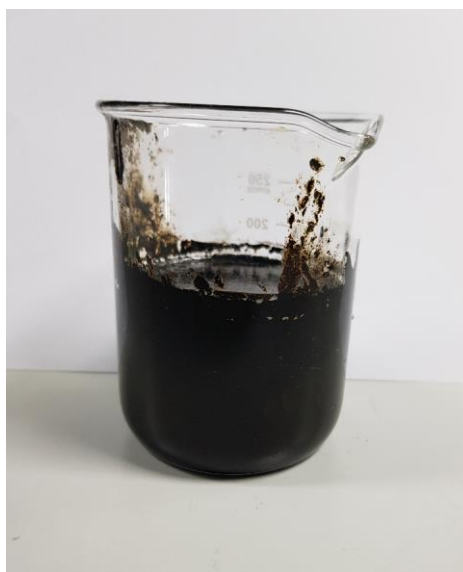

Figure S2. No phase separation after extraction with ChCl/LA/CA (1/4/1) (Experiment No. 12).

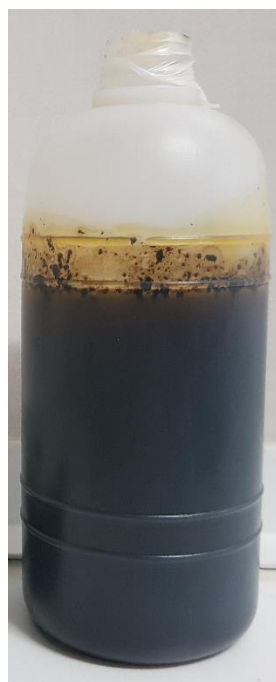

Figure S3. The ChCl/PEG (1/6) recovered from Experiment No. 13.

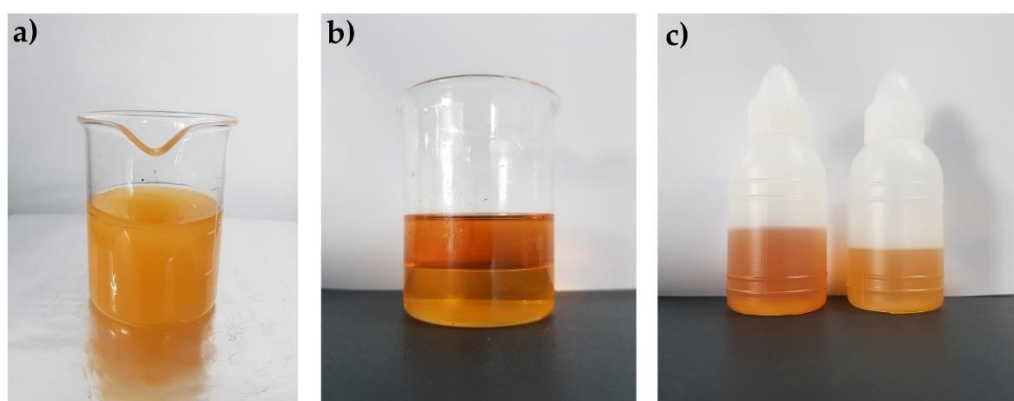

Figure S4. Recycling DES with acetone (Experiment No. 19); a) stirring the mixture of DES with acetone; b) phase separation and c) recovery of the two phases. The recycled DES is in the right bottle.

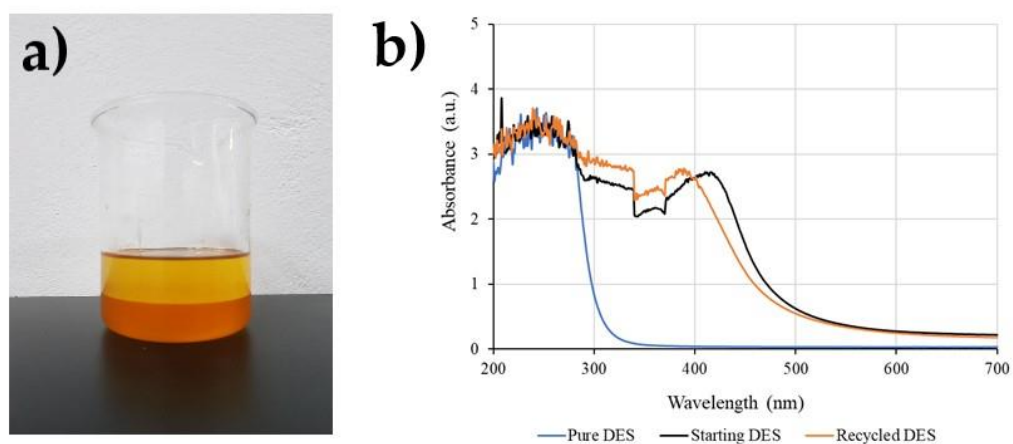

Figure S5. Recycling DES with toluene; a) the phase separation between recycled DES (bottom phase) and the recovered toluene (top phase); b) the UV-Vis spectrum of the recycled DES compared to the spectra of the pure DES and of the starting impure DES.

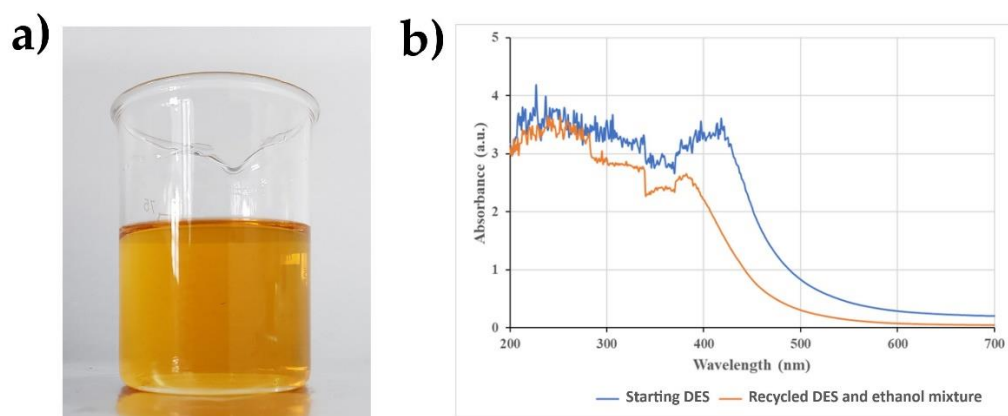

Figure S6. Recycling DES with ethanol; a) the mixture of the impure DES with ethanol and b) the UV-Vis spectrum of the mixture between ethanol and recycled DES compared to the spectrum of the starting impure DES.

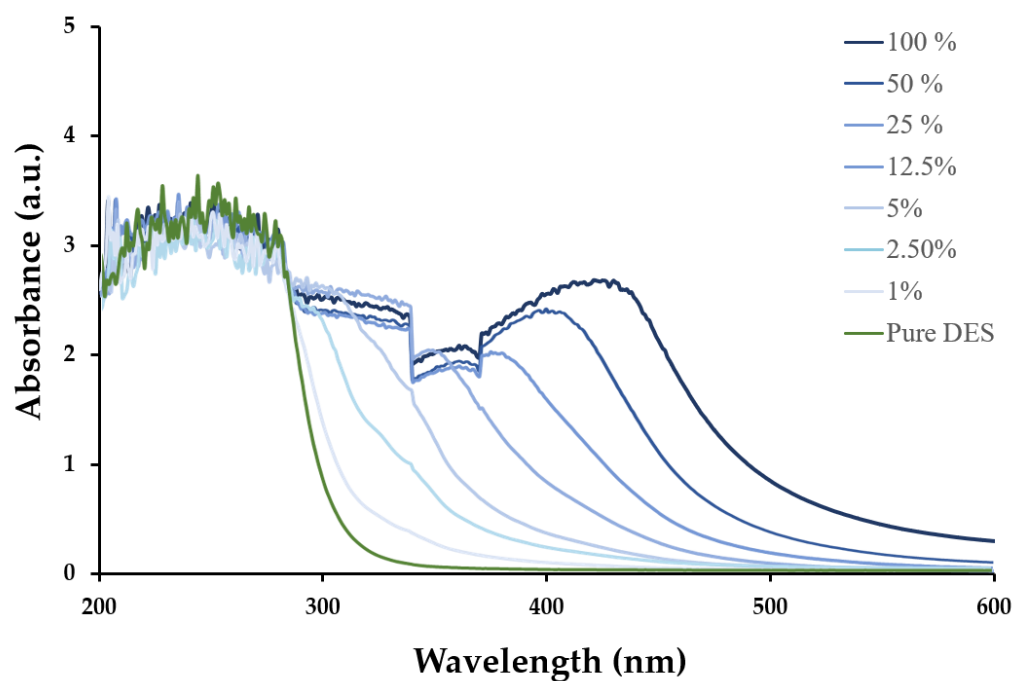

Figure S7. UV-Vis spectra of the solutions of impure, used DES diluted with pure DES at varying concentrations. The solutions represent DES samples with varying impurity levels, where “100%” represents the starting impure DES.

Table S1. Data for the calibration curve used to estimate the level of impurity of recycled DES.

| Impurity of DES | Wavelength (nm) at absorbance=1 |
|-----------------|---------------------------------|
| 100 %           | 490                             |
| 50 %            | 455                             |
| 25 %            | 427                             |
| 12.5 %          | 392                             |
| 5 %             | 355                             |
| 2.5 %           | 337                             |
| 1 %             | 307                             |

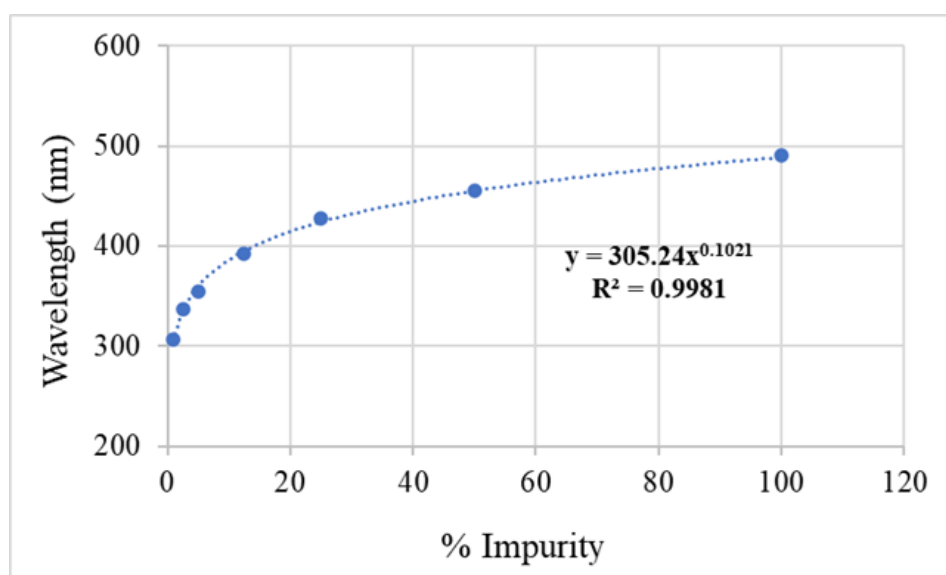

Figure S8. The calibration curve for the correlation between % level of impurity and wavelength at absorbance=1.
